# Supplementary figures and images for: Transcriptional Differences of Coding and Non-Coding Genes Related to the Absence of Melanocyte in Skins of Bama Pig
Source: MDPI journal article supplement (doi:10.3390/genes11010047), 2019-12-30

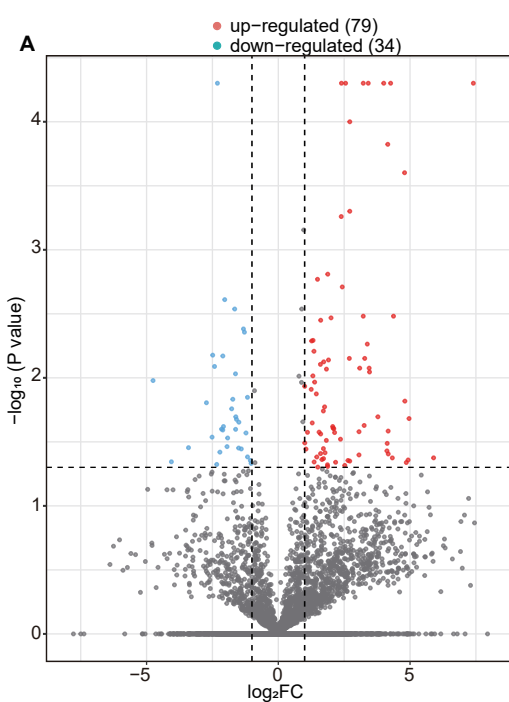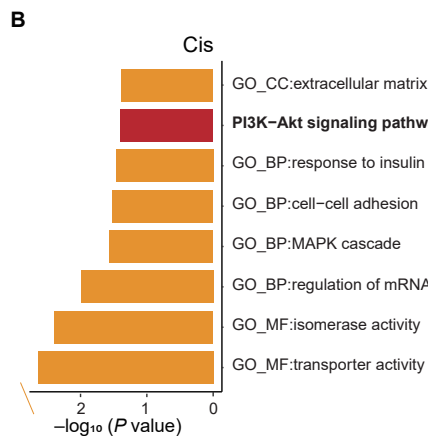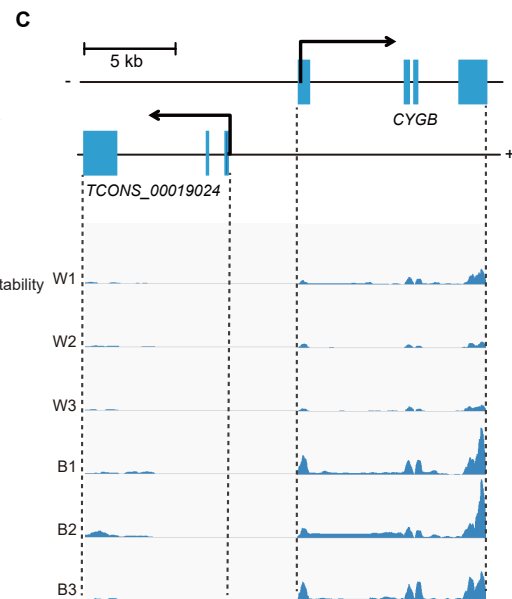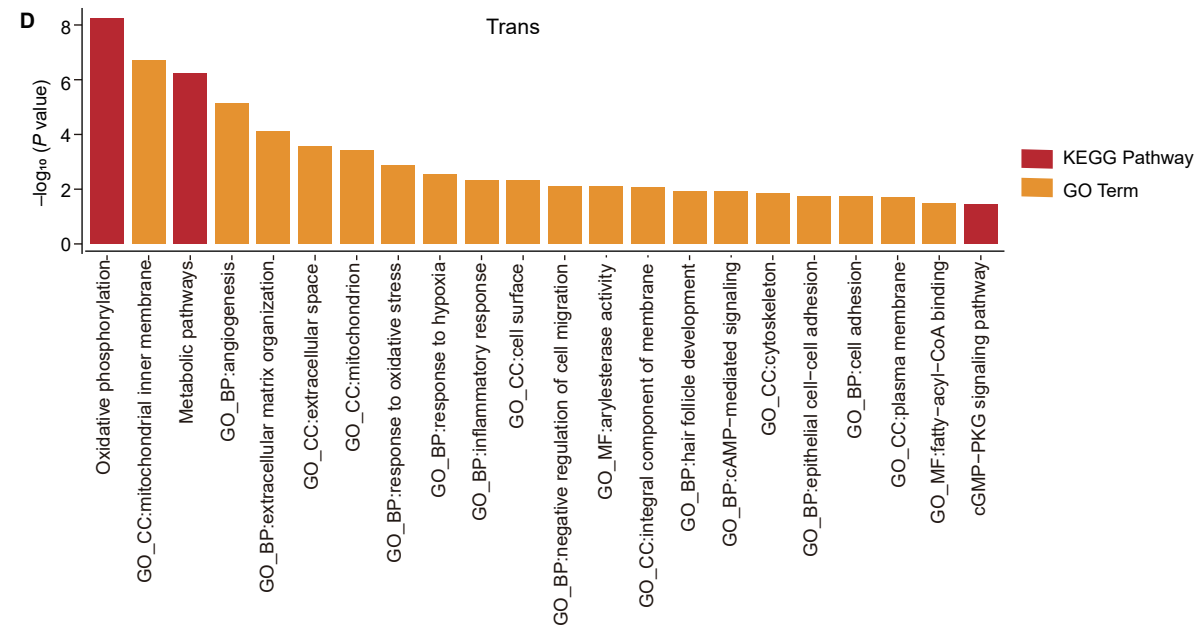

Supplement: s1 [file s1]

**A**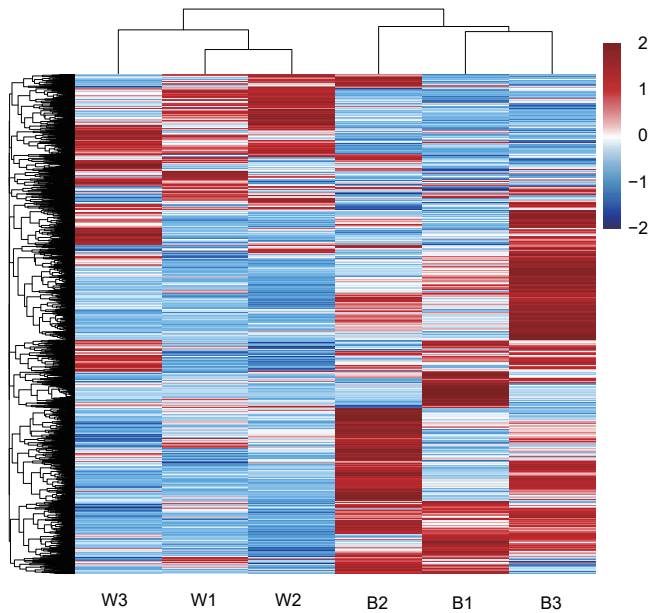**B**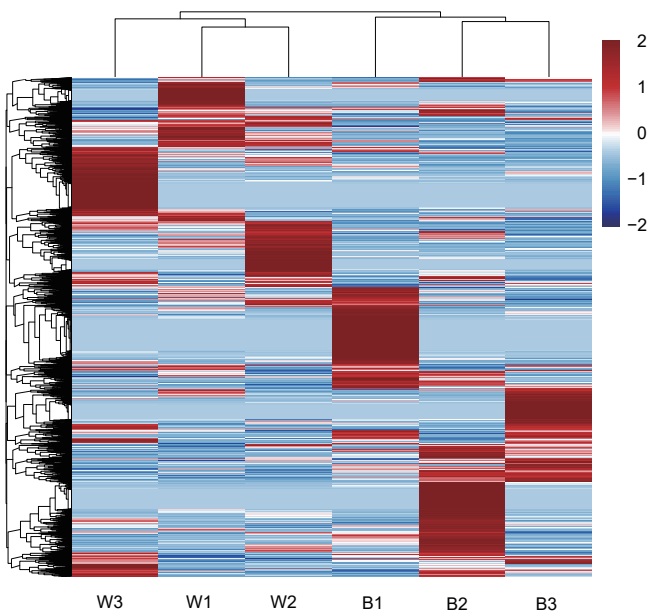**C**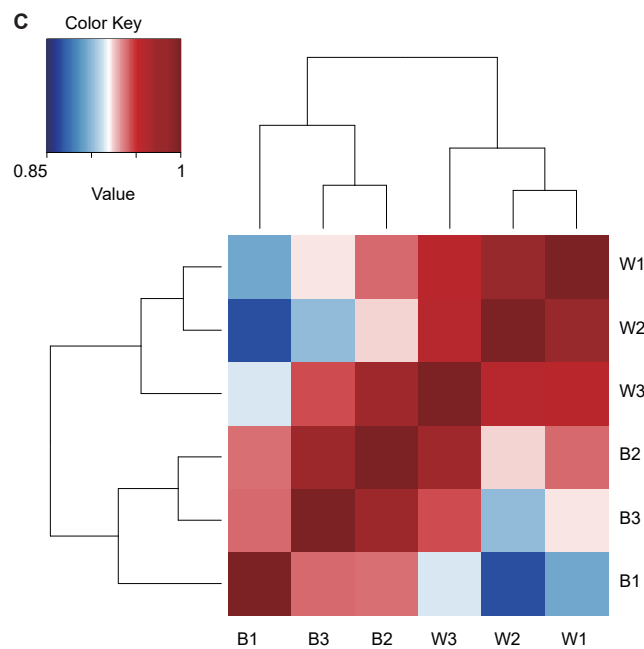**D**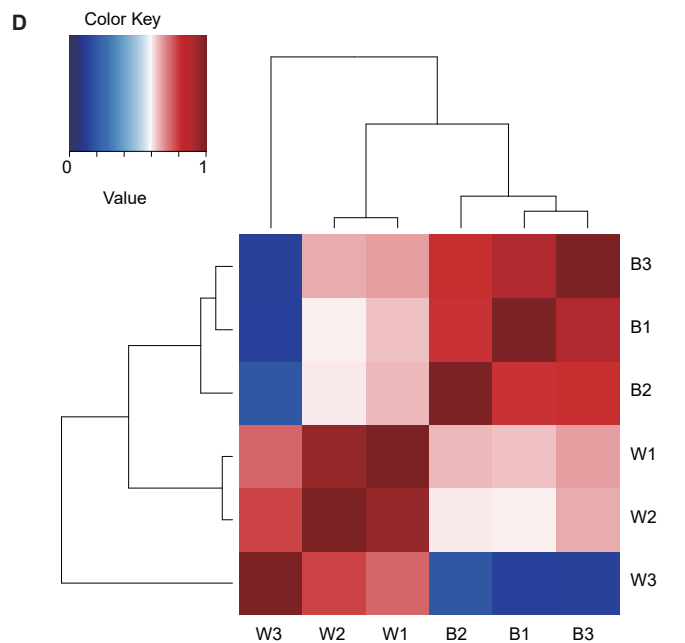

Supplement: s1 [file s1]

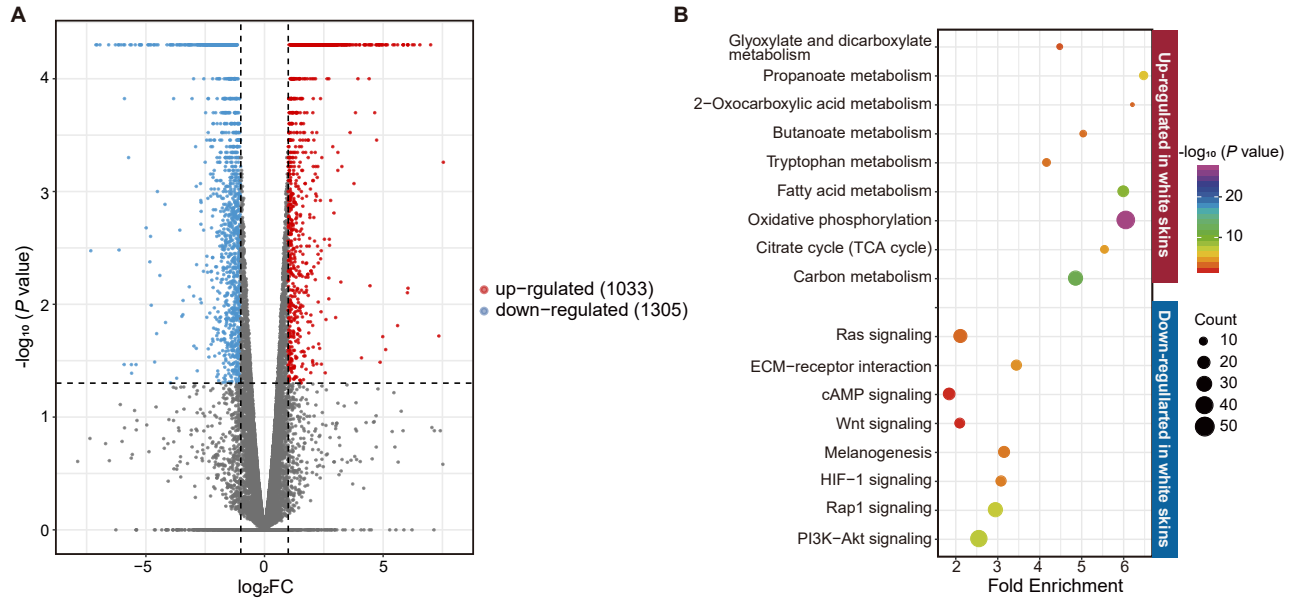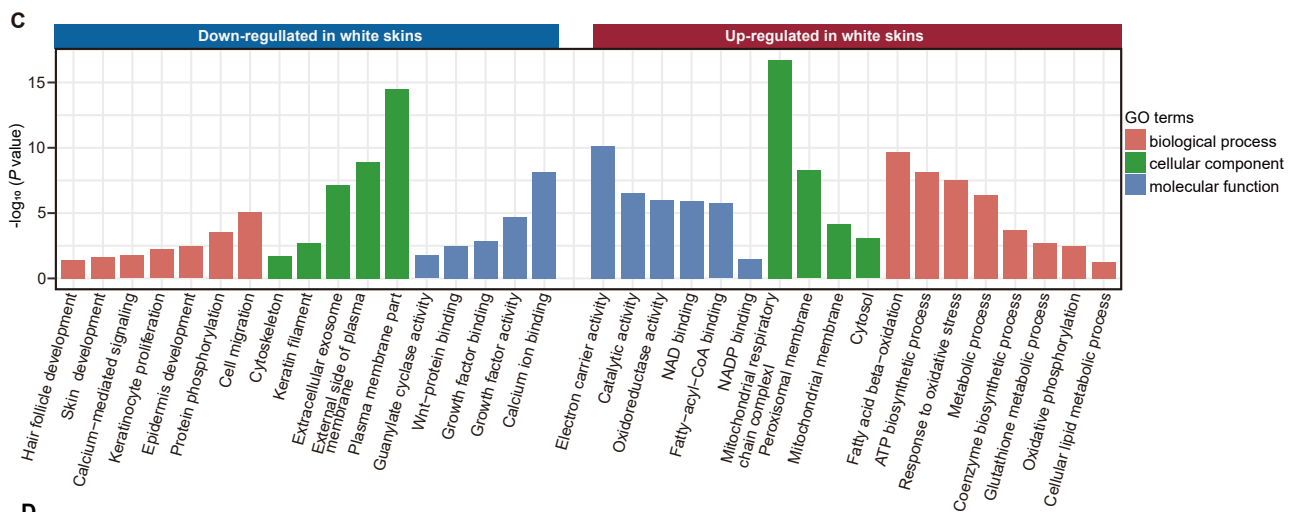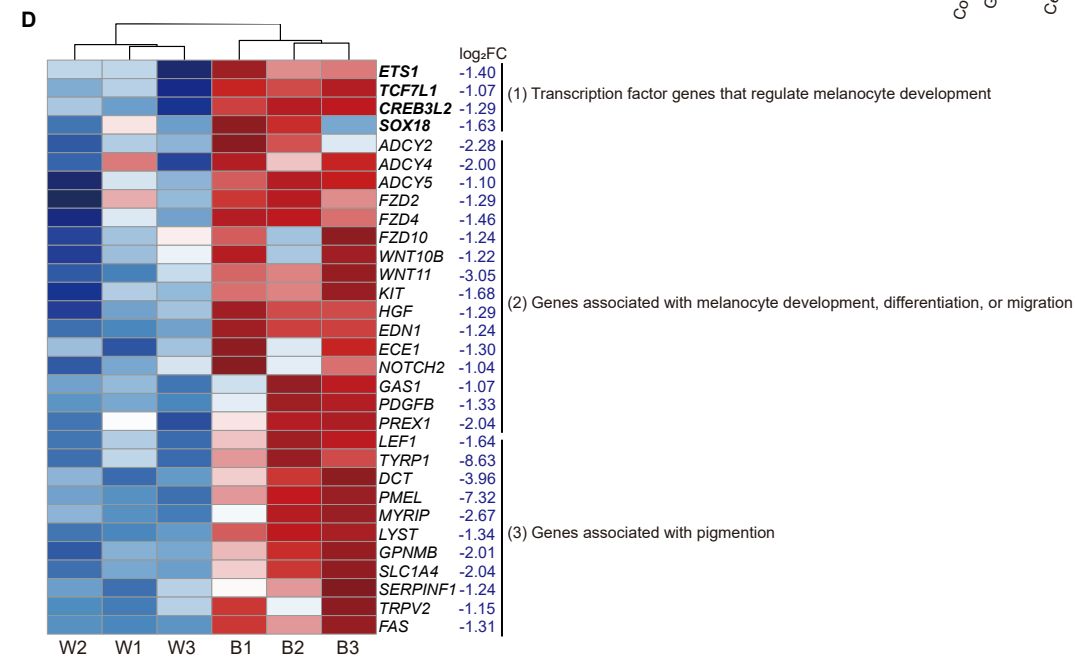

Supplement: s1 [file s1]

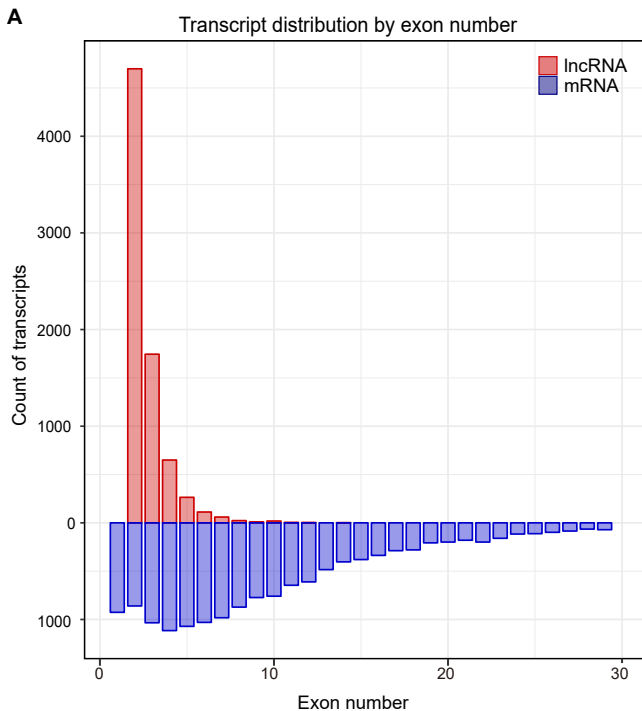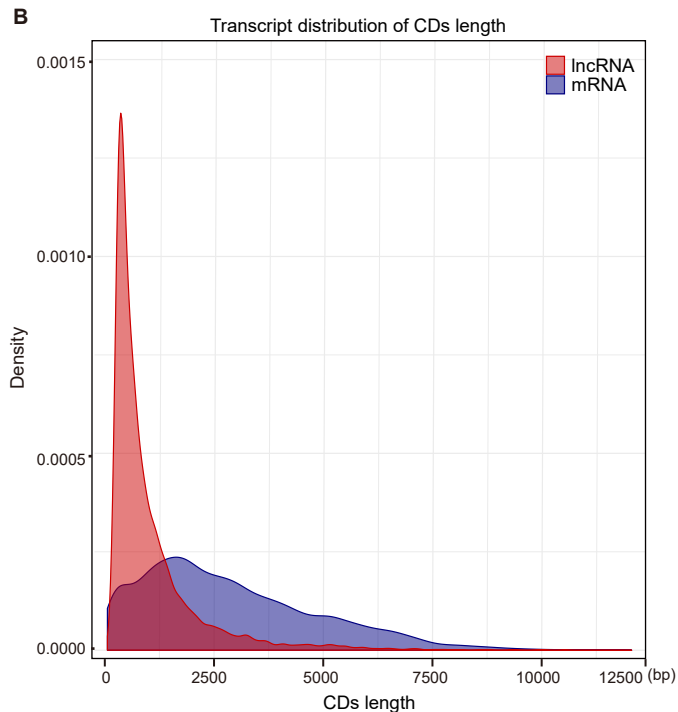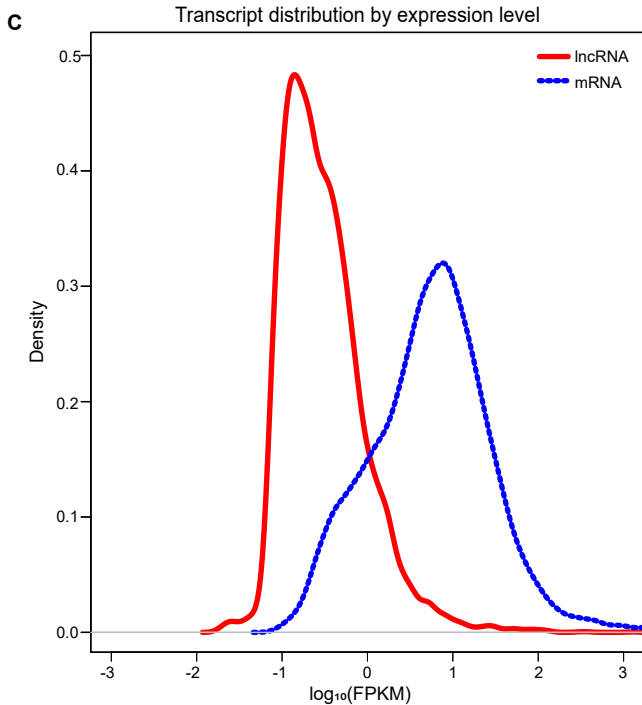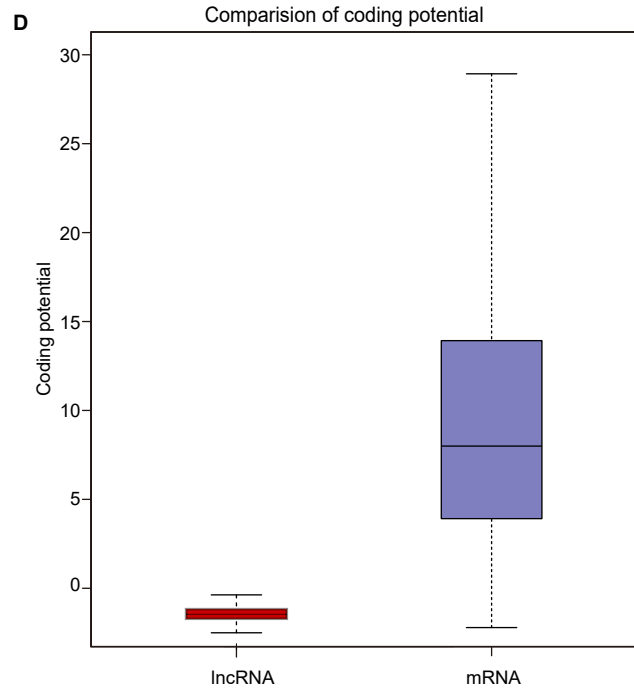

Supplement: s1 [file s1]

**A**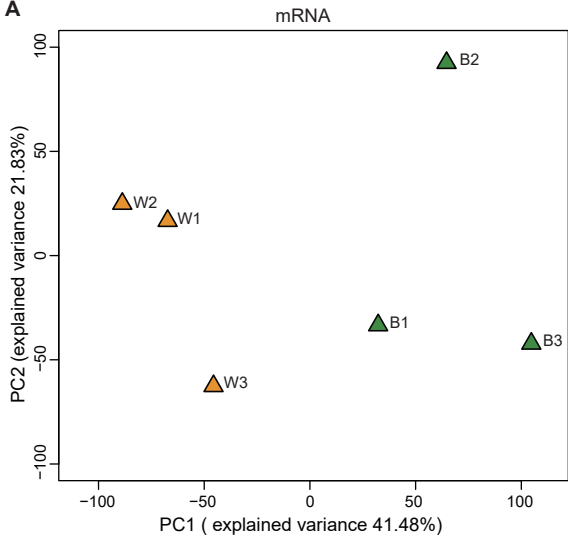**B**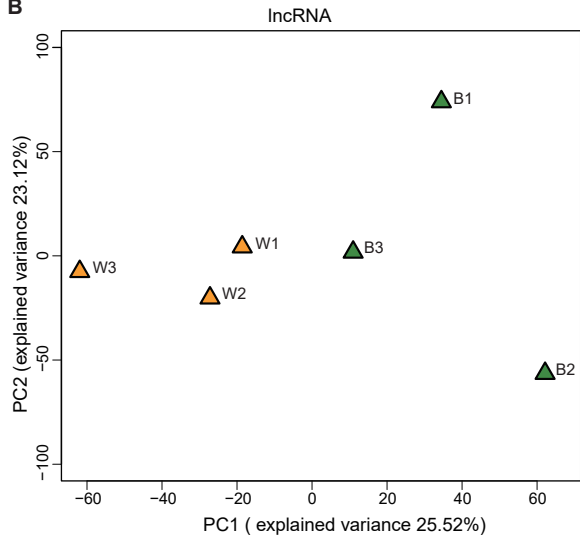

Supplement: s1 [file s1]

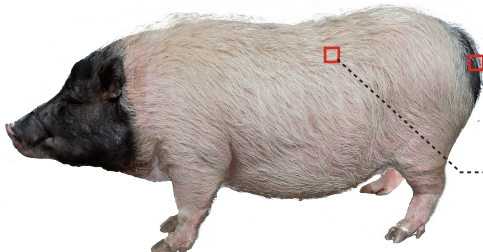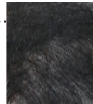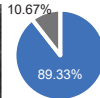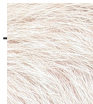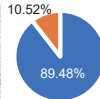

- Fibroblasts
- Keratinocytes
- Melanocytes

Supplement: s1 [file s1]

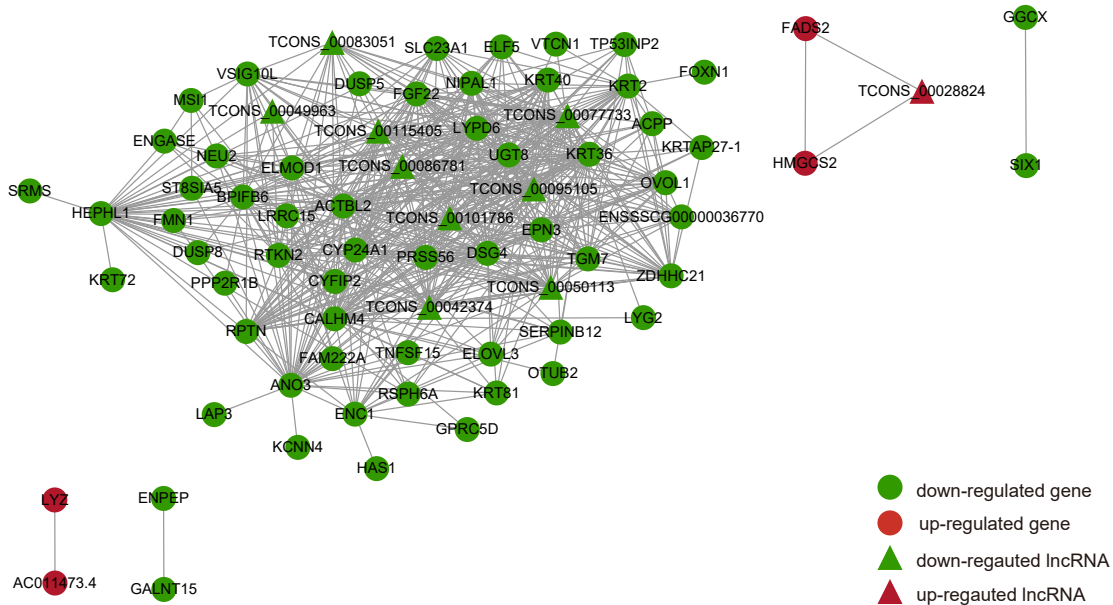

Supplement: s1 [file s1]

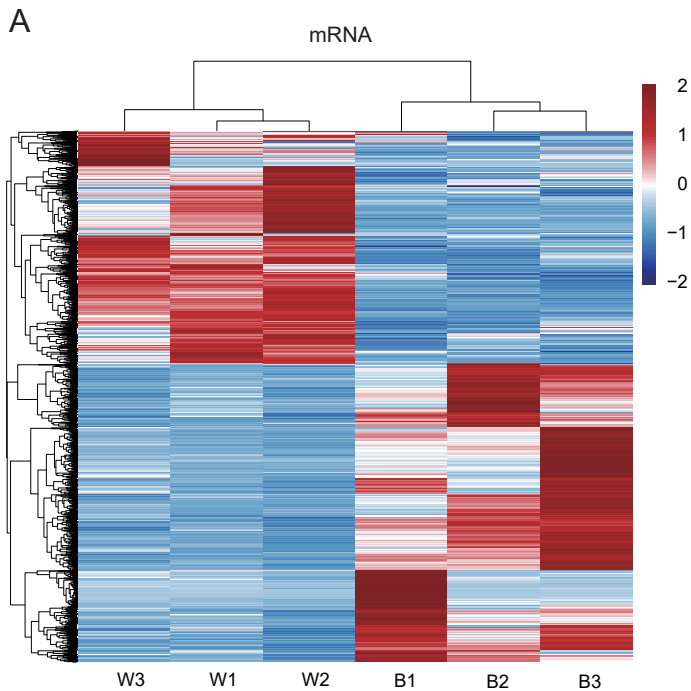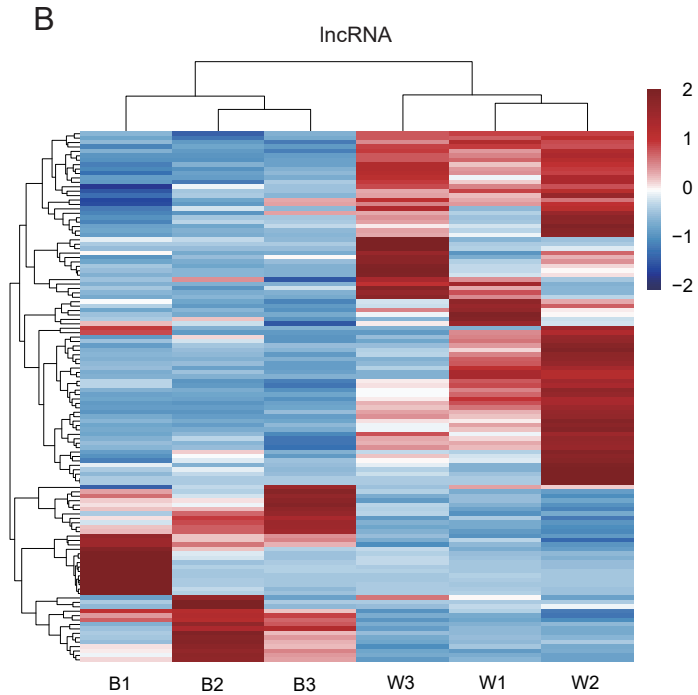

Supplement: s1 [file s1]

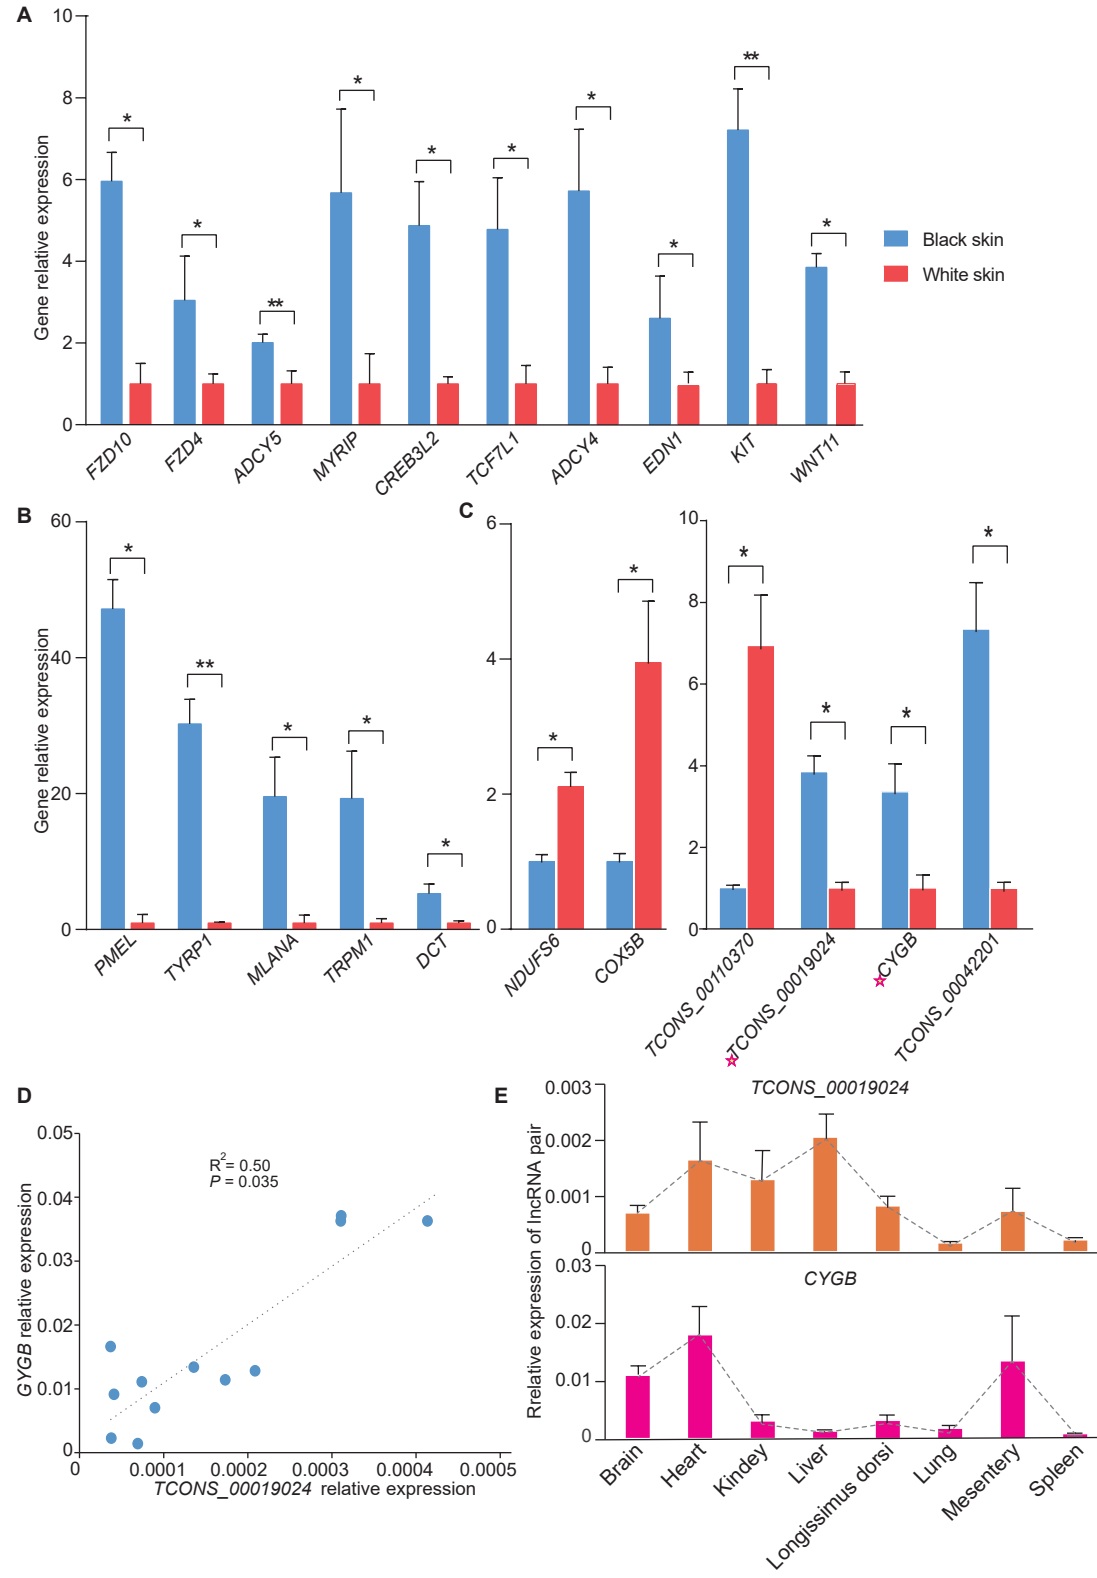

Supplement: s1 [file s1]
